# Supplementary material for: Utility of bronchoscopically obtained frozen cytology pellets for next-generation sequencing
Source: Springer Nature journal article supplement (doi:10.1186/s12885-024-12250-5), 2024-04-17
Supplement: MOESM2 [file 26990236]

DNA (ng/mL)

Pellet

Tissue

RNA (ng/mL)

Pellet

Tissue

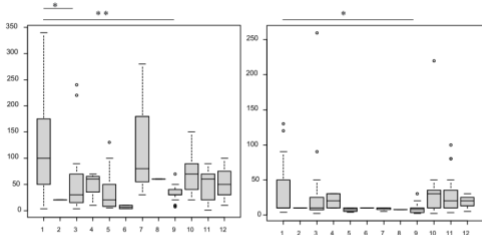

1-EBUS-TBNA, 2-TBB (ultrathin), 3-EBUS-GS-TBB (thin), 4-EBUS-GS-TBB (thick), 5-EBB, 6-TBB under X-ray fluoroscopy, 7-EBUS-TBNA, 8-TBB (ultrathin), 9-EBUS-GS-TBB (thin), 10-EBUS-GS-TBB (thick), 11-EBB, 12-TBB under X-ray fluoroscopy

\*  $P \leq 0.05$ ; \*\*  $P \leq 0.01$
